# Supplementary material for: Cytoplasmic HAX1 Is an Independent Risk Factor for Breast Cancer Metastasis
Source: Hindawi journal article supplement (doi:10.1155/2019/6375025), 2019-04-10
Supplement: f1 [file 6375025.f1.pdf]

## Supplementary materials

Table S1 Clinical and pathological characteristics of breast cancer patients.

|                                          | All patients                   |           |       | Comparative group |      |           | Distant metastasis group |     |      | P-value             |
|------------------------------------------|--------------------------------|-----------|-------|-------------------|------|-----------|--------------------------|-----|------|---------------------|
|                                          | values                         | no.       | %     | values            | no.  | %         | values                   | no. | %    |                     |
| <b>Patients</b>                          |                                | 46        | 100.0 |                   | 23   | 50.0      |                          | 23  | 50.0 |                     |
| <b>Age at diagnosis (years)</b>          |                                |           |       |                   |      |           |                          |     |      | 0.6445 <sup>a</sup> |
|                                          | median                         | 59.0      |       | 58.6              |      | 61.5      |                          |     |      |                     |
|                                          | range                          | 22.9-84.4 |       | 30.5-84.4         |      | 22.9-75.6 |                          |     |      |                     |
| <b>Menopausal status</b>                 |                                |           |       |                   |      |           |                          |     |      | 0.7241 <sup>b</sup> |
|                                          | pre                            | 8         | 17.4  | 5                 | 21.7 | 3         | 13.0                     |     |      |                     |
|                                          | post                           | 29        | 63.0  | 14                | 60.9 | 15        | 65.2                     |     |      |                     |
|                                          | unknown                        | 9         | 19.6  | 4                 | 17.4 | 5         | 21.7                     |     |      |                     |
| <b>Tumor size (pT)</b>                   |                                |           |       |                   |      |           |                          |     |      | 0.1818 <sup>a</sup> |
|                                          | 1                              | 21        | 45.7  | 12                | 52.2 | 9         | 39.1                     |     |      |                     |
|                                          | 2                              | 19        | 41.3  | 10                | 43.5 | 9         | 39.1                     |     |      |                     |
|                                          | 3                              | 4         | 8.7   | 1                 | 4.3  | 3         | 13.0                     |     |      |                     |
|                                          | 4                              | 2         | 4.3   | 0                 | 0.0  | 2         | 8.7                      |     |      |                     |
| <b>Nodal status (pN)</b>                 |                                |           |       |                   |      |           |                          |     |      | 0.1880 <sup>a</sup> |
|                                          | 0                              | 29        | 63.0  | 16                | 69.6 | 13        | 56.5                     |     |      |                     |
|                                          | 1                              | 10        | 21.7  | 6                 | 26.1 | 4         | 17.4                     |     |      |                     |
|                                          | 2                              | 4         | 8.7   | 1                 | 4.3  | 3         | 13.0                     |     |      |                     |
|                                          | 3                              | 3         | 6.5   | 0                 | 0.0  | 3         | 13.0                     |     |      |                     |
| <b>Histology</b>                         |                                |           |       |                   |      |           |                          |     |      | 0.4599 <sup>b</sup> |
|                                          | ductal                         | 32        | 69.6  | 15                | 65.2 | 17        | 73.9                     |     |      |                     |
|                                          | lobular                        | 7         | 15.2  | 5                 | 21.7 | 2         | 8.7                      |     |      |                     |
|                                          | others (including mixed types) | 7         | 15.2  | 3                 | 13.0 | 4         | 17.4                     |     |      |                     |
| <b>Molecular subtype</b>                 |                                |           |       |                   |      |           |                          |     |      | 0.0979 <sup>b</sup> |
|                                          | luminal A                      | 24        | 52.2  | 15                | 65.2 | 9         | 39.1                     |     |      |                     |
|                                          | luminal B HER2-                | 4         | 8.7   | 1                 | 4.3  | 3         | 13.0                     |     |      |                     |
|                                          | luminal B HER2+                | 10        | 21.7  | 5                 | 21.7 | 5         | 21.7                     |     |      |                     |
|                                          | nonluminal HER2+               | 3         | 6.5   | 2                 | 8.7  | 1         | 4.3                      |     |      |                     |
|                                          | triple negative/basal-like     | 5         | 10.9  | 0                 | 0.0  | 5         | 21.7                     |     |      |                     |
| <b>Stage (AJCC)</b>                      |                                |           |       |                   |      |           |                          |     |      | 0.0647 <sup>a</sup> |
|                                          | I                              | 17        | 37.0  | 10                | 43.5 | 7         | 30.4                     |     |      |                     |
|                                          | II                             | 20        | 43.5  | 12                | 52.2 | 8         | 34.8                     |     |      |                     |
|                                          | III                            | 9         | 19.6  | 1                 | 4.3  | 8         | 34.8                     |     |      |                     |
| <b>Grade (Nottingham grading system)</b> |                                |           |       |                   |      |           |                          |     |      | 0.2963 <sup>a</sup> |
|                                          | 1                              | 5         | 10.9  | 4                 | 17.4 | 1         | 4.3                      |     |      |                     |
|                                          | 2                              | 23        | 50.0  | 11                | 47.8 | 12        | 52.2                     |     |      |                     |
|                                          | 3                              | 16        | 34.8  | 7                 | 30.4 | 9         | 39.1                     |     |      |                     |
|                                          | unknown                        | 2         | 4.3   | 1                 | 4.3  | 1         | 4.3                      |     |      |                     |
| <b>ER status</b>                         |                                |           |       |                   |      |           |                          |     |      | 0.5216 <sup>b</sup> |
|                                          | negative                       | 14        | 30.4  | 6                 | 26.1 | 8         | 34.8                     |     |      |                     |
|                                          | positive                       | 32        | 69.6  | 17                | 73.9 | 15        | 65.2                     |     |      |                     |
| <b>PGR status</b>                        |                                |           |       |                   |      |           |                          |     |      | 0.0439 <sup>b</sup> |
|                                          | negative                       | 12        | 26.1  | 3                 | 13.0 | 9         | 39.1                     |     |      |                     |
|                                          | positive                       | 34        | 73.9  | 20                | 87.0 | 14        | 60.9                     |     |      |                     |
| <b>HER2 status</b>                       |                                |           |       |                   |      |           |                          |     |      | 0.7433 <sup>b</sup> |
|                                          | negative                       | 33        | 71.7  | 16                | 69.6 | 17        | 73.9                     |     |      |                     |
|                                          | positive                       | 13        | 28.3  | 7                 | 30.4 | 6         | 26.1                     |     |      |                     |
| <b>Surgery</b>                           |                                |           |       |                   |      |           |                          |     |      | 0.1528 <sup>b</sup> |
|                                          | tumorectomy                    | 10        | 21.7  | 7                 | 30.4 | 3         | 13.0                     |     |      |                     |
|                                          | mastectomy                     | 36        | 78.3  | 16                | 69.6 | 20        | 87.0                     |     |      |                     |
| <b>Chemotherapy</b>                      |                                |           |       |                   |      |           |                          |     |      | 0.7425 <sup>b</sup> |
|                                          | yes                            | 25        | 54.3  | 13                | 56.5 | 12        | 52.2                     |     |      |                     |
|                                          | no                             | 18        | 39.1  | 8                 | 34.8 | 10        | 43.5                     |     |      |                     |
|                                          | unknown                        | 3         | 6.5   | 2                 | 8.7  | 1         | 4.3                      |     |      |                     |
| <b>Radiotherapy</b>                      |                                |           |       |                   |      |           |                          |     |      | 0.8329 <sup>b</sup> |
|                                          | yes                            | 12        | 26.1  | 6                 | 26.1 | 6         | 26.1                     |     |      |                     |
|                                          | no                             | 31        | 67.4  | 15                | 65.2 | 16        | 69.6                     |     |      |                     |
|                                          | unknown                        | 3         | 6.5   | 2                 | 8.7  | 1         | 4.3                      |     |      |                     |
| <b>Hormonal therapy</b>                  |                                |           |       |                   |      |           |                          |     |      | 0.3319 <sup>b</sup> |
|                                          | yes                            | 33        | 71.7  | 18                | 78.3 | 15        | 65.2                     |     |      |                     |
|                                          | no                             | 10        | 21.7  | 3                 | 13.0 | 7         | 30.4                     |     |      |                     |
|                                          | unknown                        | 3         | 6.5   | 2                 | 8.7  | 1         | 4.3                      |     |      |                     |
| <b>Herceptin</b>                         |                                |           |       |                   |      |           |                          |     |      | 0.8357 <sup>b</sup> |
|                                          | yes                            | 4         | 8.7   | 2                 | 8.7  | 2         | 8.7                      |     |      |                     |
|                                          | no                             | 39        | 84.8  | 19                | 82.6 | 20        | 87.0                     |     |      |                     |
|                                          | unknown                        | 3         | 6.5   | 2                 | 8.7  | 1         | 4.3                      |     |      |                     |

<sup>a)</sup>P-value of Mann-Whitney U test

<sup>b)</sup>P-value of Pearson chi square test

A group of 46 breast cancer patients was divided into two groups: with and without distant metastasis (comparative group) within a follow-up period of 9 years. Baseline demographic and tumor characteristics as well as types of treatment were compared between these two groups using Mann-Whitney U test for continuous (age) and ordinal variables (tumor size, nodal status, stage, grade), and by Pearson chi square test for categorical variables (menopausal status, histology, molecular subtype, ER, PGR and HER2 status, treatment options).

Fig. S1 Dataset legend to Oncomine meta-analysis of *HAX1* expression in breast cancer (ductal and lobular).

1. Invasive Ductal and Invasive Lobular Breast Carcinoma vs. Normal  
Curtis Breast, Nature, 2012

2. Invasive Ductal Breast Carcinoma vs. Normal  
Curtis Breast, Nature, 2012

3. Invasive Lobular Breast Carcinoma vs. Normal  
Curtis Breast, Nature, 2012

4. Ductal Breast Carcinoma vs. Normal  
Perou Breast, Nature, 2000

5. Lobular Breast Carcinoma vs. Normal  
Perou Breast, Nature, 2000

6. Invasive Ductal Breast Carcinoma vs. Normal  
Radvanyi Breast, Proc Natl Acad Sci U S A, 2005

7. Invasive Lobular Breast Carcinoma vs. Normal  
Radvanyi Breast, Proc Natl Acad Sci U S A, 2005

8. Ductal Breast Carcinoma vs. Normal  
Richardson Breast 2, Cancer Cell, 2006

9. Ductal Breast Carcinoma vs. Normal  
Sorlie Breast, Proc Natl Acad Sci U S A, 2001

10. Lobular Breast Carcinoma vs. Normal  
Sorlie Breast, Proc Natl Acad Sci U S A, 2001

11. Ductal Breast Carcinoma vs. Normal  
Sorlie Breast 2, Proc Natl Acad Sci U S A, 2003

12. Lobular Breast Carcinoma vs. Normal  
Sorlie Breast 2, Proc Natl Acad Sci U S A, 2003

13. Invasive Ductal and Lobular Carcinoma vs. Normal  
TCGA Breast, No Associated Paper, 2011

14. Invasive Ductal Breast Carcinoma vs. Normal  
TCGA Breast, No Associated Paper, 2011

15. Invasive Lobular Breast Carcinoma vs. Normal  
TCGA Breast, No Associated Paper, 2011

16. Invasive Ductal Breast Carcinoma vs. Normal  
Turashvili Breast, BMC Cancer, 2007

17. Invasive Lobular Breast Carcinoma vs. Normal  
Turashvili Breast, BMC Cancer, 2007

18. Invasive Ductal Breast Carcinoma vs. Normal  
Zhao Breast, Mol Biol Cell, 2004

19. Lobular Breast Carcinoma vs. Normal  
Zhao Breast, Mol Biol Cell, 2004

Fig. S2 *HAX1* overexpression is associated with metastatic relapse (additional data).

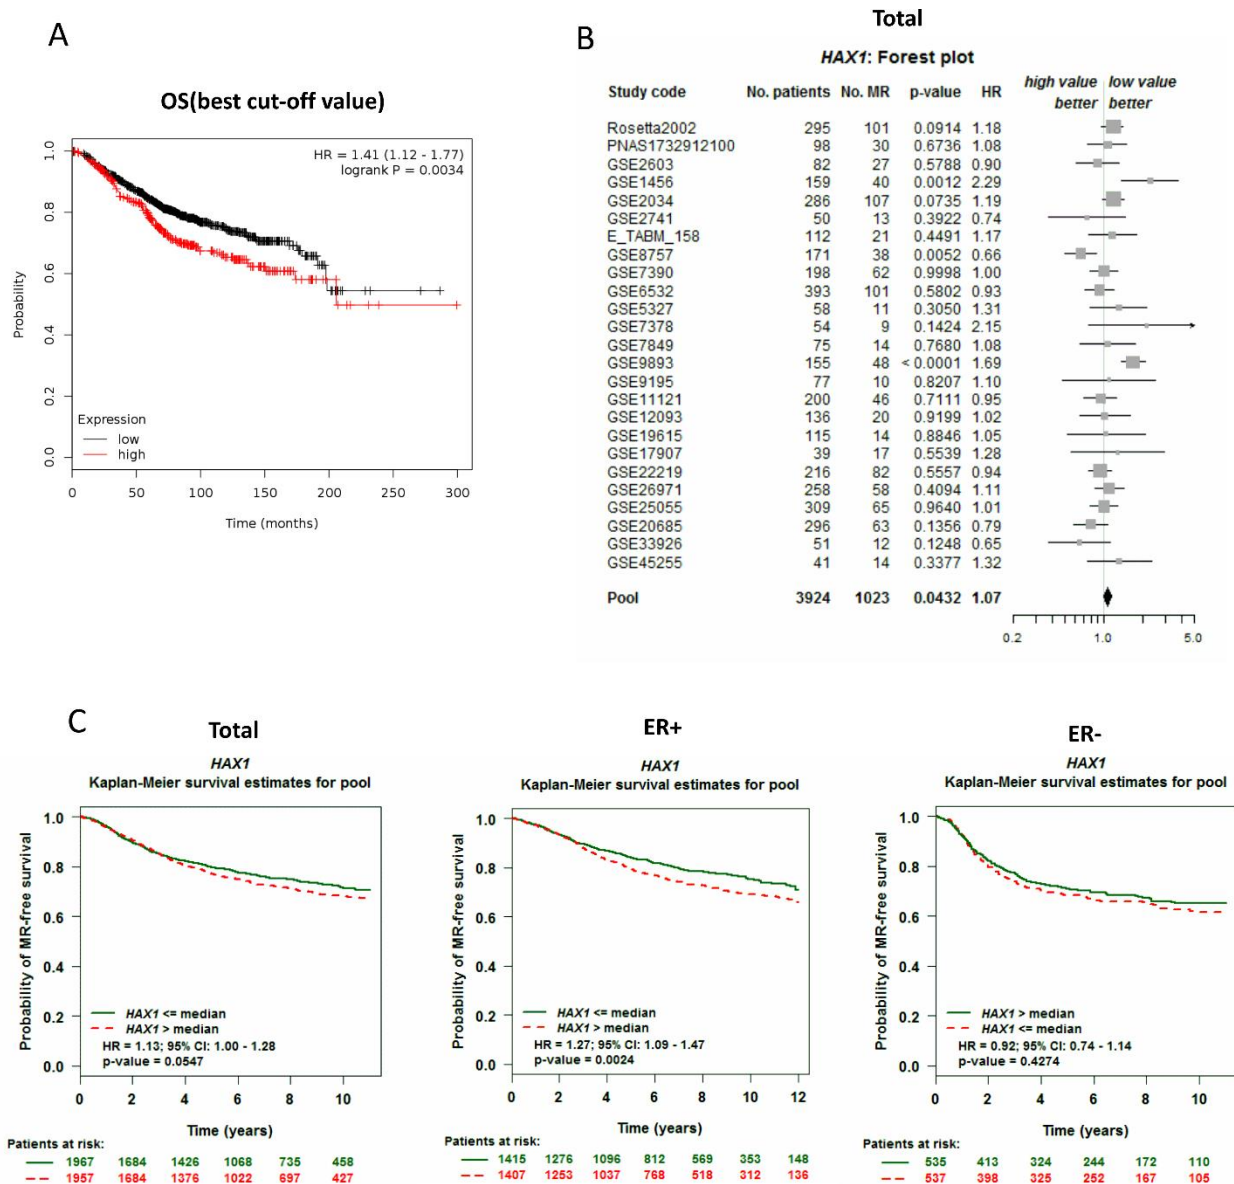

A. Overall survival (OS) analysis for total number of patients (n=1,402). Statistically significant more favorable prognosis for patients with lower *HAX1* expression, but only if patients were split by best cut-off value B. Forest plot for total number of patients with metastatic relapse information (n=3,924) (bcGenExMiner) C. Kaplan-Meier curves for metastatic relapse-free survival (MRFS) plotted in bcGenExMiner for each group of patients with metastatic relapse information (all patients, ER+, ER-). Patients were split by median into groups with high and low *HAX1* expression.
